# Supplementary material
Source: publisher figshare collection journal article supplement (https://geolsoc.figshare.com/ndownloader/files/5421974)
Supplement: Supplementary file 1 [file 5421974]

Data for figures 53-57
Globocassidulina subglobosa							Polymorphinids
WA-	Samples	Mean %	Max %				WA-	Samples	Mean %	Max %					Guttulina								Gyroidina - Gyroidinoides
74	2	0.90	1.20	mar mar	Jamaica		94	9	3.59	9.22	fjord	Svalbard			WA-	Samples	Mean %	Max %					WA-	Samples	Mean %	Max %
78	16	4.99	18.18	mar mar	Tobago		N19	5	0.14	0.30	fjord	Svalbard			36	5	15.48	45.44	estuary	Ob, Russia	sp.		N20	2	0.55	0.80	fjord	Hardangerfjord	sp.
83	4	1.63	3.00	mar mar	California		95	4	1.73	2.48	fjord	Novaya Zemlya			49	1	0.20	0.20	estuary	N Spain	lactea		N32	3	0.70	0.90	shelf	S China Sea	lamarckiana
84	4	1.50	3.00	mar mar	California		98	2	2.15	3.23	fjord	Svalbard			70	1	0.27	0.27	lagoon	Mexico	australis		119	1	0.59	0.59	shelf	Celtic Sea	neosoldanii
92	7	0.10	0.10	shelf	Mississippi		111	11	1.50	3.28	shelf	Barents Sea			96	13	0.35	0.99	fjord	Svalbard	sp.		127	1	0.06	0.06	shelf	Adriatic	orbicularis
116	1	0.80	0.80	shelf	Scotland		40	1	2.00	2.00	shelf	Plymouth			99	2	1.20	1.20	fjord	Norway	sp./lactea		127	1	0.97	0.97	shelf	Adriatic	umbonata
117	6	0.87	1.26	shelf	Channel		113	13	0.39	0.75	shelf	Skagerrak			100	1	0.33	0.33	fjord	Norway	sp.		N25	3	0.19	0.32	shelf	Biscay	umbonata
118	17	2.38	10.71	shelf	Channel		118	11	0.40	1.61	shelf	Channel			36	5	0.95	1.74	shelf	Ob, Russia	sp.		N26	4	3.28	11.80	shelf	Biscay	umbonata
N25	4	0.65	1.37	shelf	Biscay		124	37	0.44	1.20	shelf	Adriatic			40	1	1.33	1.33	shelf	Plymouth	lactea		N27	11	0.14	0.25	shelf	Biscay	umbonata
123	5	1.42	2.60	shelf	Portugal		127	1	0.06	0.06	shelf	Adriatic			92	2	2.00	3.00	shelf	Mississippi	australis		131	2	5.30	8.20	shelf	W Africa	umbonata
124	72	0.46	1.20	shelf	Adriatic		136	8	1.48	4.20	shelf	Grand Banks			114	4	1.26	2.92	shelf	North Sea	lactea		133	4	1.43	2.31	shelf	G o Guinea	umbonata
127	1	0.40	0.40	shelf	Adriatic		153	4	0.50	1.00	shelf	Baja California			117	10	0.93	1.52	shelf	Channel	lactea		127	1	0.24	0.24	shelf	Adriatic	sp.
128	3	0.33	0.60	shelf	Adriatic		160	9	1.58	3.23	shelf	San Diego			118	7	0.43	0.78	shelf	Channel	lactea		132	4	5.44	8.22	shelf	NW Africa	perlucida
N28	4	7.83	15.80	shelf	W Mediterranean		165	2	1.45	1.70	shelf	Japan			119	2	0.35	0.39	shelf	Celtic	harrisi		121	2	0.95	1.00	deep sea	Biscay	altiformis
132	10	2.27	4.70	shelf	NW Africa		211	3	0.23	0.48	shelf	S China Sea			N25	1	0.05	0.05	shelf	Biscay	lactea		127	4	0.33	0.71	deep sea	Adriatic	altiformis
133	7	2.93	11.20	shelf	G o Guinea		135	1	1.03	1.03	deep sea	Arctic			128	8	0.36	0.96	shelf	Adriatic	problema		194	2	0.66	0.89	deep sea	G o Cadiz	altiformis
140	1.0	1.42	1.42	shelf	E USA		N41	1	4.55	4.55	deep sea	Barents Sea			129	27	5.08	15.22	shelf	Adriatic	problema		196	4	0.67	1.19	deep sea	Portugal	altiformis
142	2	1.05	1.50	shelf	E USA		N44	3	0.29	0.46	deep sea	Biscay			130	9	4.20	8.54	shelf	Adriatic	problema		199	21	0.54	2.53	deep sea	Biscay	altiformis
146	13	1.22	3.10	shelf	Texas		199	8	0.56	0.83	deep sea	Biscay			137	2	0.70	0.70	shelf	Scotia shelf	lactea		200	1	0.53	0.53	deep sea	Cap Blanc	altiformis
150	2	8.80	14.10	shelf	Argerntina		N50	1	0.20	0.20	deep sea	W Mediterranean			138	3	2.31	5.26	shelf	E USA	sp.		209	4	4.12	9.79	deep sea	Calif	altiformis
152	3	2.10	5.00	shelf	California		N51	2	0.90	1.10	deep sea	W Mediterranean			140	2	0.30	0.30	shelf	E USA	lactea/pulchella		213	8	1.46	2.55	deep sea	Scotia Sea	altiformis
153	13	1.99	9.00	shelf	Baja California		Total	136	0.98						141	12	0.32	0.91	shelf	E USA	see column		N44	11	0.48	1.32	deep sea	Biscay	altiformis
154	27	6.33	27.00	shelf	Mexico										142	9	0.80	1.39	shelf	E USA	see column		N46	4	0.28	0.50	deep sea	Biscay	altiformis
159	15	3.73	9.00	shelf	California										159	1	1.00	1.00	shelf	California	quinquecostata		N48	2	0.55	0.80	deep sea	Portugal	altiformis
160	49	3.50	15.00	shelf	California		Globulina								163	2	2.30	2.30	shelf	Japan	lactea/pacifica		N49	2	1.31	2.13	deep sea	Portugal	altiformis
192	6	0.10	0.10	shelf	N North Sea		WA-	Samples	Mean %	Max %					164	2	2.00	2.00	shelf	Japan	sp.		N50	1	0.20	0.20	deep sea	W Mediterranean	altiformis
N44	6	0.37	0.72	deep sea	Biscay		99	1	0.50	0.5	fjord	Norway	gibba		166	2	9.40	12.50	shelf	Japan	austracea/yamagazii		N51	5	2.02	3.40	deep sea	W Mediterranean	altiformis
N49	3	2.12	2.78	deep sea	Portugal		100	1	0.32	0.3	fjord	Norway	gibba		192	15	0.83	2.00	shelf	North Sea	austrica		N31	1	0.40	0.40	deep sea	Nicaragua	altiformis
123	12	3.76	8.50	deep sea	Portugal		N41	1	3.07	3.07	shelf	Barents Sea	sp.		192	1	0.10	0.10	deep sea	Norwegian Sea	austrica		N53	4	0.23	0.28	deep sea	S China Sea	altiformis
N50	2	0.20	0.20	deep sea	San Tropez		40	1	1.10	1.1	shelf	Plymouth	gibba		N41	1	1.30	1.30	deep sea	Portugal	sp.		133	14	1.67	3.42	deep sea	G o Guinea	lamarckiana
132	9	4.12	7.40	deep sea	NW Africa		117	8	0.80	1.3	shelf	Channel	gibba		N31	1	0.09	0.09	deep sea	Nicaragua	communis		192	18	2.72	9.00	deep sea	Iceland	lamarckiana
133	31	1.71	11.50	deep sea	G o Guinea		118	3	0.17	0.3	shelf	Channel	gibba		211	2	0.30	0.40	deep sea	S China Sea	communis		193	10	3.20	9.00	deep sea	Norway	lamarckiana
N52	1	0.65	0.65	deep sea	N Carolina		N27	1	0.05	0.1	shelf	Rhone	rotundata		Total	154	2.30						203	17	1.21	5.00	deep sea	S Atlantic	lamarckiana
156	1	0.40	0.40	deep sea	Baja California		N28	2	3.85	5.1	shelf	W Mediterranean	spp.										211	23	0.78	2.90	deep sea	S China Sea	lamarckiana
160	42	2.14	19.00	deep sea	California		133	3	0.77	0.7	deep sea	Gulf of Guinea	gibba										N53	4	0.225	0.4	deep sea	S China Sea	lamarckiana
N31	7	4.74	19.78	deep sea	Nicaragua		119	1	0.38	0.4	shelf	Celtic	inaequalis										N55	1	0.04	0.04	deep sea	Arabian Sea	lamarckiana
166	1	2.13	2.13	deep sea	Japan		Total	22	1.01														123	13	1.89	4.70	deep sea	Portugal	neosoldanii
173	8	17.04	26.30	deep sea	Larsen shelf																		192	6	1.02	2.00	deep sea	Iceland	neosoldanii
192	11	2.05	11.00	deep sea	Iceland-Norwegian Sea																		194	6	0.70	1.01	deep sea	G o Cadiz	neosoldanii
194	1	0.96	0.96	deep sea	G o Cadiz		Vasiglobulina																195	3	1.82	2.59	deep sea	Portugal	neosoldanii
195	1	2.65	2.65	deep sea	Portugal		WA-	Samples	Mean %	Max %													196	6	0.75	1.55	deep sea	Portugal	neosoldanii
202	33	2.36	28.80	deep sea	E S Atlantic		40	2	1.80	1.90	shelf	Plymouth	myristiformis										203	7	0.85	2.00	deep sea	S Atlantic	neosoldanii
203	30	1.48	6.73	deep sea	S Atlantic		117	5	1.89	3.27	shelf	Channel	myristiformis										204	4	0.73	1.10	deep sea	W Mediterranean	neosoldanii
207	1	1.30	1.30	deep sea	G o Mexico		118	1	0.28	0.28	shelf	Channel	myristiformis										206	1	4.90	4.90	deep sea	New Jersey	neosoldanii
211	14	0.71	1.40	deep sea	S China Sea		128	3	0.27	0.38	shelf	Adriatic	myristiformis										N53	2	0.08	0.11	deep sea	S China Sea	neosoldanii
N53	11	0.38	1.13	deep sea	S China Sea		130	8	2.76	6.77	shelf	Adriatic	myristiformis										216	1	0.47	0.47	deep sea	Weddell Sea	neosoldanii
213	51	3.13	21.70	deep sea	Scotia Sea		139	9	1.67	4.48	shelf	E USA	sp.										121	2	1.75	3.20	deep sea	Biscay	orbicularis
214	3	3.03	7.00	deep sea	Scotia Sea		141	8	0.47	1.15	shelf	E USA	sp.										127	12	1.80	4.00	deep sea	Adriatic	orbicularis
215	19	1.67	6.10	deep sea	Weddell Sea		142	4	1.12	1.89	shelf	E USA	sp.										133	1	0.98	0.98	deep sea	G o Guinea	orbicularis
216	2	3.45	4.70	deep sea	Weddell Sea		Total	40	1.49														192	8	1.39	5.00	deep sea	Iceland	orbicularis
219	1	7.85	7.85	deep sea	Ross Sea																		193	5	0.82	1.00	deep sea	Norway	orbicularis
Total	595	2.54																					194	1	0.40	0.40	deep sea	G o Cadiz	orbicularis
																							195	1	0.86	0.86	deep sea	Portugal	orbicularis
																							199	16	0.46	1.34	deep sea	Biscay	orbicularis
																							200	3	0.73	1.60	deep sea	Cap Blanc	orbicularis
																							203	4	3.00	5.07	deep sea	S Atlantic	orbicularis
																							206	3	1.00	1.10	deep sea	New Jersey	orbicularis
																							211	10	0.41	1.10	deep sea	S China Sea	orbicularis
																							214	2	2.00	3.00	deep sea	Scotia Sea	orbicularis
																							N40	7	7.01	24.70	deep sea	Sea of Okhotsk	orbicularis
																							N44	12	2.32	4.37	deep sea	Biscay	orbicularis
																							N45	5	1.95	5.30	deep sea	Biscay	orbicularis
																							N46	4	0.23	0.30	deep sea	Biscay	orbicularis
																							N48	8	2.16	4.00	deep sea	Portugal	orbicularis
																							N49	1	0.40	0.40	deep sea	Portugal	orbicularis
																							N50	2	0.85	1.50	deep sea	W Mediterranean	orbicularis
																							N51	9	5.32	15.70	deep sea	W Mediterranean	orbicularis
																							N53	4	0.19	0.30	deep sea	S China Sea	orbicularis
																							133	28	1.26	3.76	deep sea	G o Guinea	polia
																							201	3	1.03	1.40	deep sea	trop Atlant	polia
																							202	30	1.23	5.77	deep sea	E S Atlantic	polia
																							203	21	1.00	3.00	deep sea	S Atlantic	polia
																							N31	1	0.19	0.19	deep sea	Nicaragua	polia
																							N26	4	1.08	2.00	deep sea	Biscay	umbonata
																							N42	5	0.41	0.76	deep sea	Biscay	umbonata
																							N43	8	0.38	0.78	deep sea	Biscay	umbonata
																							N44	5	0.53	1.05	deep sea	Biscay	umbonata
																							N49	3	3.15	5.29	deep sea	Portugal	umbonata
																							121	9	1.12	2.70	deep sea	Portugal	umbonata
																							127	12	0.81	2.67	deep sea	Adriatic	umbonata
																							N50	2	1.20	1.60	deep sea	W Mediterranean	umbonata
																							N51	3	0.47	0.80	deep sea	W Mediterranean	umbonata
																							131	5	2.22	7.10	deep sea	W Africa	umbonata
																							133	31	0.96	2.26	deep sea	G o Guinea	umbonata
																							199	7	1.68	3.02	deep sea	Biscay	umbonata
																							201	2	0.65	0.90	deep sea	Trop Atlant	umbonata
																							202	32	0.97	3.93	deep sea	E S Atlantic	umbonata
																							203	4	0.93	1.27	deep sea	S Atlantic	umbonata
																							211	5	0.60	1.60	deep sea	S China Sea	umbonata
																							N31	5	0.25	0.67	deep sea	Nicaragua	umbonata
																							N44	4	0.19	0.24	deep sea	Biscay	sp.
																							N45	1	1.20	1.20	deep sea	Biscay	soldanii
																							N46	1	0.10	0.10	deep sea	Biscay	sp.
																							127	5	0.66	1.33	deep sea	Adriatic	sp.
																							132	1	14.49	14.49	deep sea	NW Africa	perlucida
																							160	17	0.89	3.00	deep sea	San Diego	gemma
																							160	10	0.27	0.90	deep sea	San Diego	quinqueloba
																							156	1	0.39	0.39	basin	California	gemma
																							162	4	4.51	10.80	deep sea	El Salvador	3 spp.
																							N31	4	0.05	0.97	deep sea	Nicaragua	gemma
																							199	9	0.42	2.20	deep sea	Biscay	sp.
																							N49	1	4.92	4.92	deep sea	Portugal	subglobosus
																							203	25	1.54	6.00	deep sea	S Atlantic	sp.
																							211	6	0.29	2.80	deep sea	S China Sea	broekhina
																							N53	3	0.10	0.11	deep sea	S China Sea	sp.
																							N53	2	0.17	0.3	deep sea	S China Sea	nipponicus
																							N53	2	0.29	0.46	deep sea	S China Sea	soldanii
																							N53	10	0.30	0.71	deep sea	S China Sea	broekhiana
																							N55	1	0.08	0.08	deep sea	Arabian Sea	soladanii
																							213	18	0.93	4.16	deep sea	Scotia Sea	sp.
																							214	7	3.66	9.90	deep sea	Scotia Sea	subplanata
																							215	13	1.39	4.81	deep sea	Weddell Sea	sp.
																							Total	739	1.31
